# Supplementary material for: Two-dimensional BiSbTeX2 (X = S, Se, Te) and their Janus monolayers as efficient thermoelectric materials
Source: Royal Society of Chemistry journal article supplement (doi:10.1039/d4cp02750g), 2024-01-01
Supplement: d4cp02750g1.pdf [file d4cp02750g1.pdf]

## SUPPORTING INFORMATION

### **Two-dimensional BiSbTeX<sub>2</sub> (X = S, Se, Te) and their Janus monolayers as efficient thermoelectric materials**

KM Sujata<sup>1,2</sup>, Poonam Chauhan<sup>1</sup>, Nidhi Verma<sup>1</sup>, Rekha Garg Solanki<sup>2\*</sup> and Ashok Kumar<sup>1\*</sup>

*<sup>1</sup>Department of Physics, Central University of Punjab, Bathinda, India-151401*

*<sup>2</sup>Department of Physics, Dr. Hari Singh Gour University, Sagar, M.P., India-470003*

(October 8, 2024)

\*Corresponding Authors: [ashokphy@cup.edu.in](mailto:ashokphy@cup.edu.in) (Ashok Kumar)

[rgsolanki@dhgsu.edu.in](mailto:rgsolanki@dhgsu.edu.in) (Rekha Garg Solanki)

## Geometrical structure and stability analysis

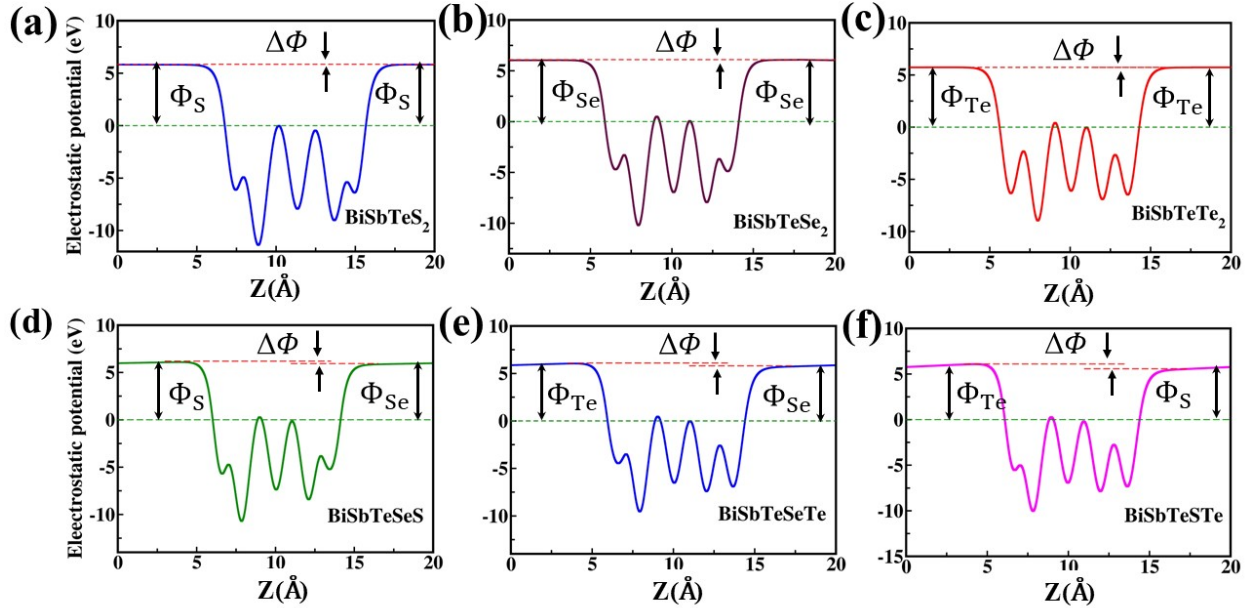

**Fig. S1** Planar average of the electrostatic potential along the  $z$  axis of the (a)-(b)  $\text{BiSbTeX}_2$  ( $X = \text{S, Se, Te}$ ) and (c)-(e) Janus  $\text{BiSbTeXY}$  ( $X/Y = \text{S, Se, Te}$ ) monolayers, respectively.

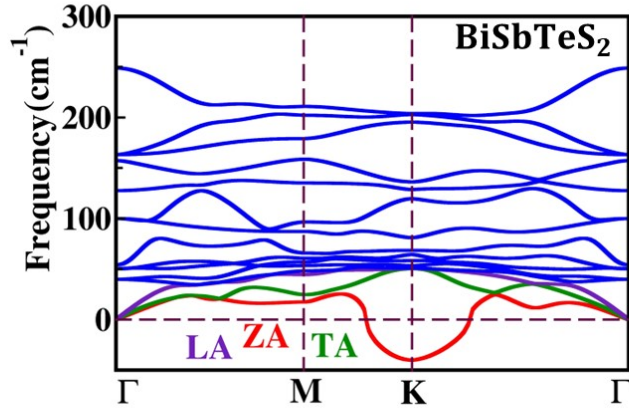

**Fig. S2** Phonon dispersion curves with ZA, TA and LA accoustical mode of  $\text{BiSbTeS}_2$  monolayer. This monolayer showing unstabilty due to ZA mode with negative frequency ( $-40.83 \text{ cm}^{-1}$ ) at K point.

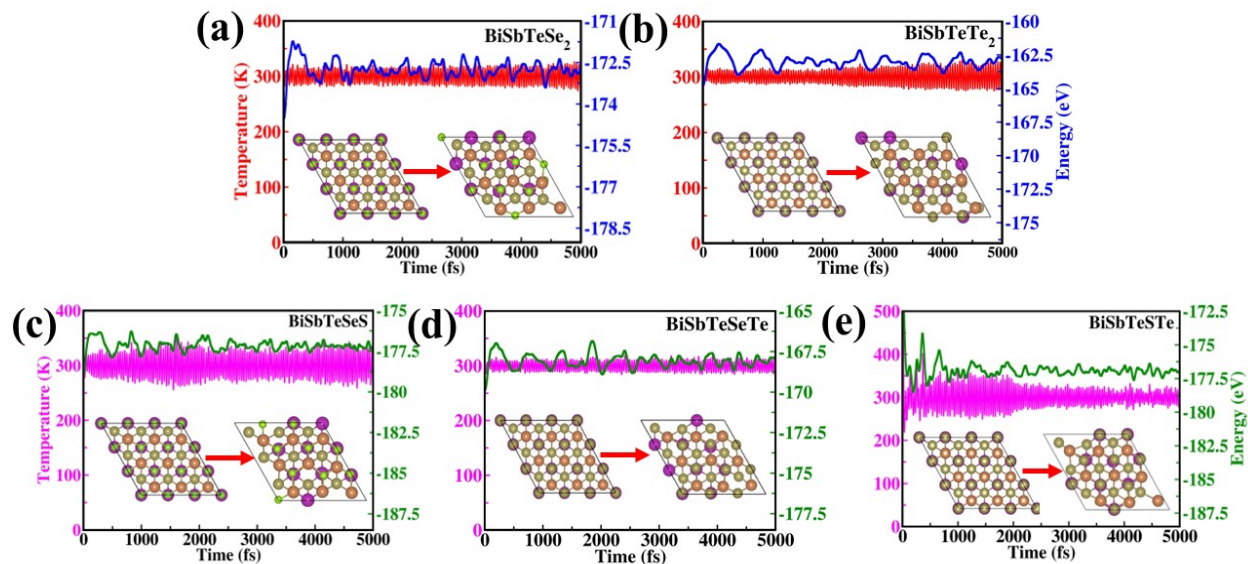

**Fig. S3** The AIMD energy and temperature fluctuations at 300 K for (a)-(b)  $\text{BiSbTeX}_2$  ( $X = \text{Se}, \text{Te}$ ) monolayers and (c)-(e) Janus  $\text{BiSbTeXY}$  ( $X/Y = \text{S}, \text{Se}, \text{Te}$ ) monolayers. The snapshot of the structures after 5000 fs AIMD simulations are also shown.

### Electronic structure and mechanical response

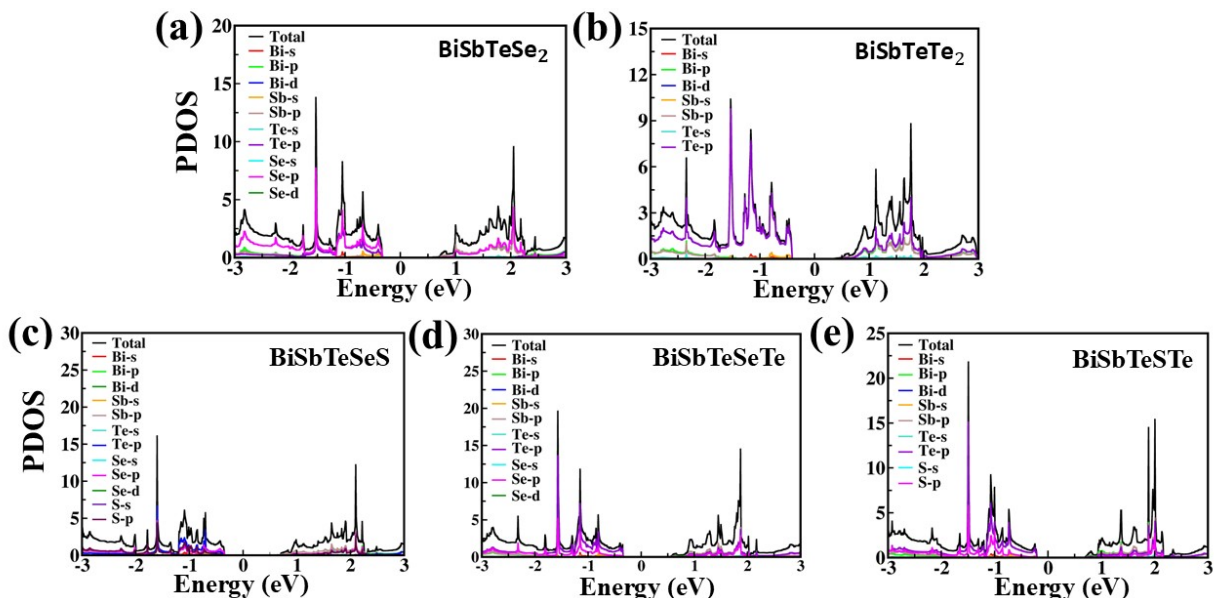

**Fig. S4** The calculated PDOS using the PBE method of the (a)-(b)  $\text{BiSbTeX}_2$  ( $X = \text{Se}, \text{Te}$ ) and (c)-(e) Janus  $\text{BiSbTeXY}$  ( $X/Y = \text{S}, \text{Se}, \text{Te}$ ) monolayers.

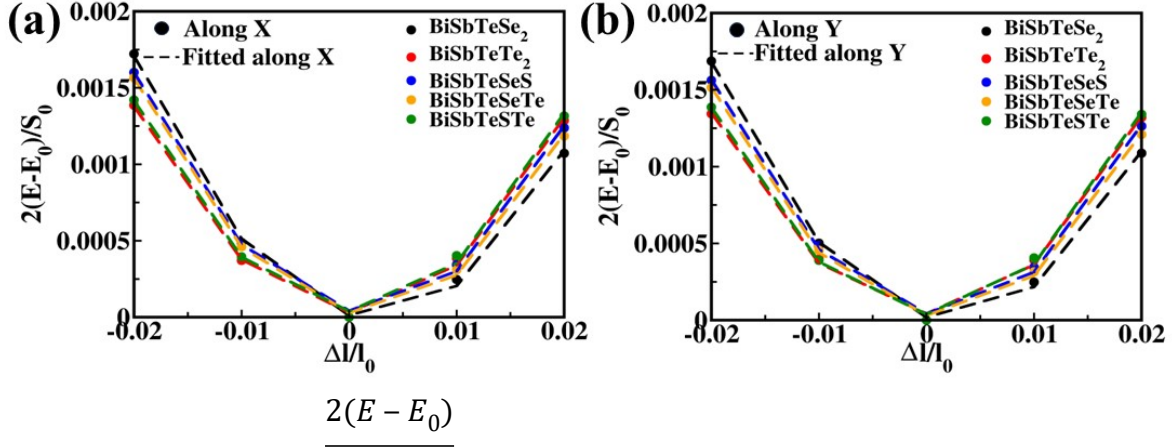

**Fig. S5** Variation of (a)-(b)  $\frac{2(E-E_0)}{S_0}$  w.r.t strain i.e.  $\Delta l/l_0$  with their parabolic and linear fitting for elastic modulus.  $(E-E_0)$  is the difference in the total energy of stable and strained structures,  $S_0$  is the surface area of the  $\text{BiSbTeX}_2$  ( $X = \text{Se, Te}$ ) and Janus  $\text{BiSbTeXY}$  ( $X/Y = \text{S, Se, Te}$ ) monolayers.

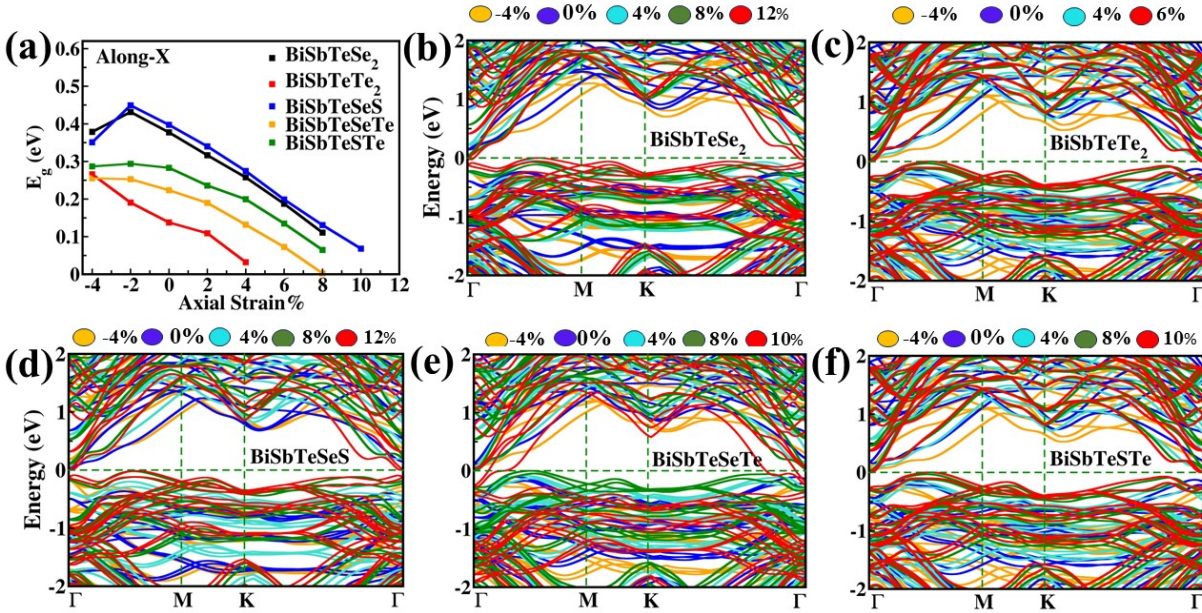

**Fig. S6** (a) The evolution of bandgaps with axial strain, (b)-(c) band plot of the  $\text{BiSbTeX}_2$  ( $X = \text{Se, Te}$ ) and (d)-(f) Janus  $\text{BiSbTeXY}$  ( $X/Y = \text{S, Se, Te}$ ) monolayers as a function of the applied uniaxial strains with the PBE+SOC method along x-direction.

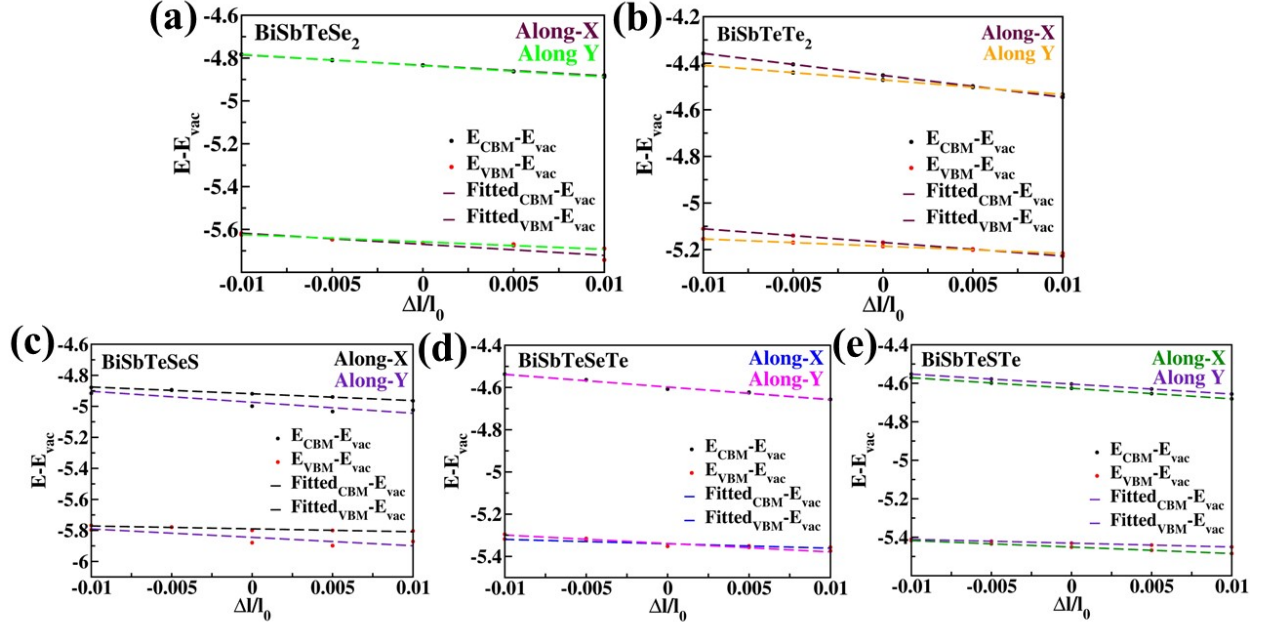

**Fig.S7** Graph and straight fit graph between of  $E - E_{vac}$  and  $\frac{\Delta l}{l_0}$  along X and Y direction,  $E - E_{vac}$  is the difference in the energy of  $i^{\text{th}}$  band and vacuum energy,  $\frac{\Delta l}{l_0}$  is the strain in the corresponding direction.

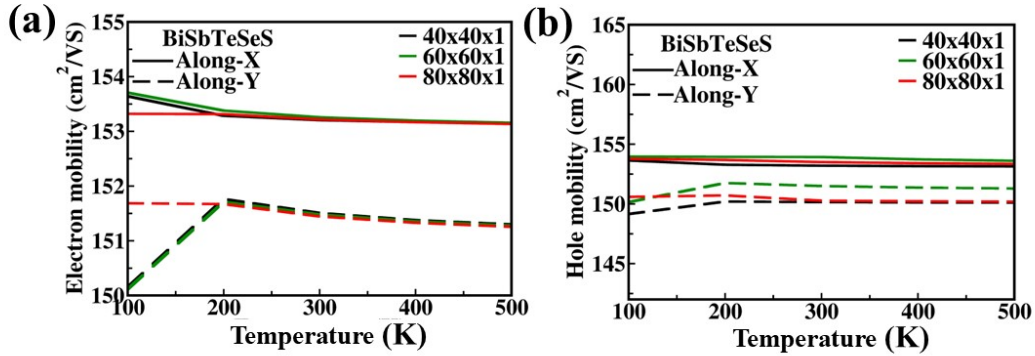

**Fig.S8** Convergence test for the electron and hole mobilities of BiSbTeSeS at the different k- and q-mesh grids.

**Table S1:** The calculated values of  $m^*$ ,  $m_d$ ,  $E_d$  and  $\mu_{2D}$  of 2D BiSbTeX<sub>2</sub> and Janus BiSbTeXY monolayers.

| Materials             | Carrier  | $m_X^*$ | $m_Y^*$ | $m_d$ | $E_{d-X}$<br>(eV) | $E_{d-Y}$<br>(eV) | $\mu_{2D-X}$<br>(cm <sup>2</sup> V <sup>-1</sup> s <sup>-1</sup> ) | $\mu_{2D-Y}$<br>(cm <sup>2</sup> V <sup>-1</sup> s <sup>-1</sup> ) |
|-----------------------|----------|---------|---------|-------|-------------------|-------------------|--------------------------------------------------------------------|--------------------------------------------------------------------|
| BiSbTeSe <sub>2</sub> | electron | 0.25    | 0.08    | 0.14  | 4.91              | 5.22              | 870                                                                | 2380                                                               |
|                       | hole     | 1.38    | 0.81    | 1.05  | 5.18              | 3.43              | 20                                                                 | 70                                                                 |
| BiSbTeTe <sub>2</sub> | electron | 0.09    | 0.21    | 0.13  | 9.39              | 6.25              | 640                                                                | 620                                                                |
|                       | hole     | 0.37    | 0.15    | 0.23  | 5.83              | 3.09              | 240                                                                | 2060                                                               |
| BiSbTeSeS             | electron | 0.09    | 0.16    | 0.12  | 4.38              | 7.07              | 3580                                                               | 770                                                                |
|                       | hole     | 0.43    | 0.20    | 0.29  | 1.86              | 5.40              | 1700                                                               | 430                                                                |
| BiSbTeSeTe            | electron | 0.25    | 0.40    | 0.31  | 6.02              | 5.92              | 240                                                                | 160                                                                |
|                       | hole     | 0.87    | 0.15    | 0.36  | 2.09              | 4.01              | 510                                                                | 820                                                                |
| BiSbTeSTe             | electron | 0.42    | 0.09    | 0.19  | 5.17              | 5.49              | 320                                                                | 1350                                                               |
|                       | hole     | 0.43    | 0.19    | 0.28  | 1.99              | 3.37              | 1470                                                               | 1160                                                               |

### Lattice thermal conductivity

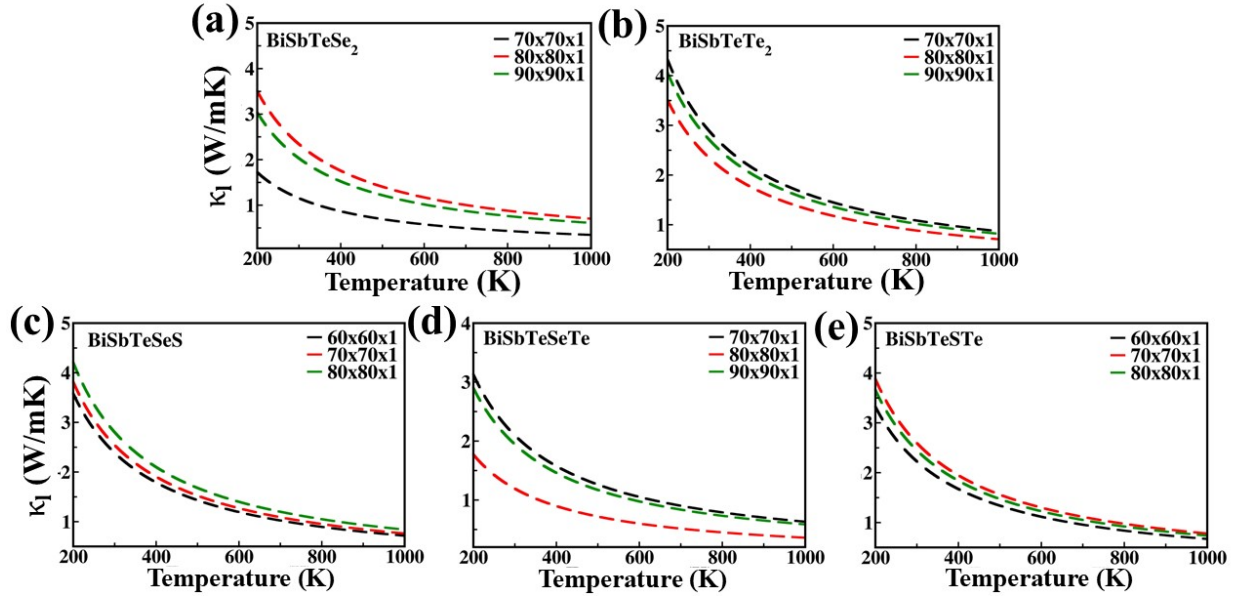

**Fig. S9** The lattice thermal conductivities convergence at the different q-mesh grids of the (a)-(b) BiSbTeX<sub>2</sub> (X = Se, Te) and (c)-(e) Janus BiSbTeXY (X/Y = S, Se, Te). monolayers.

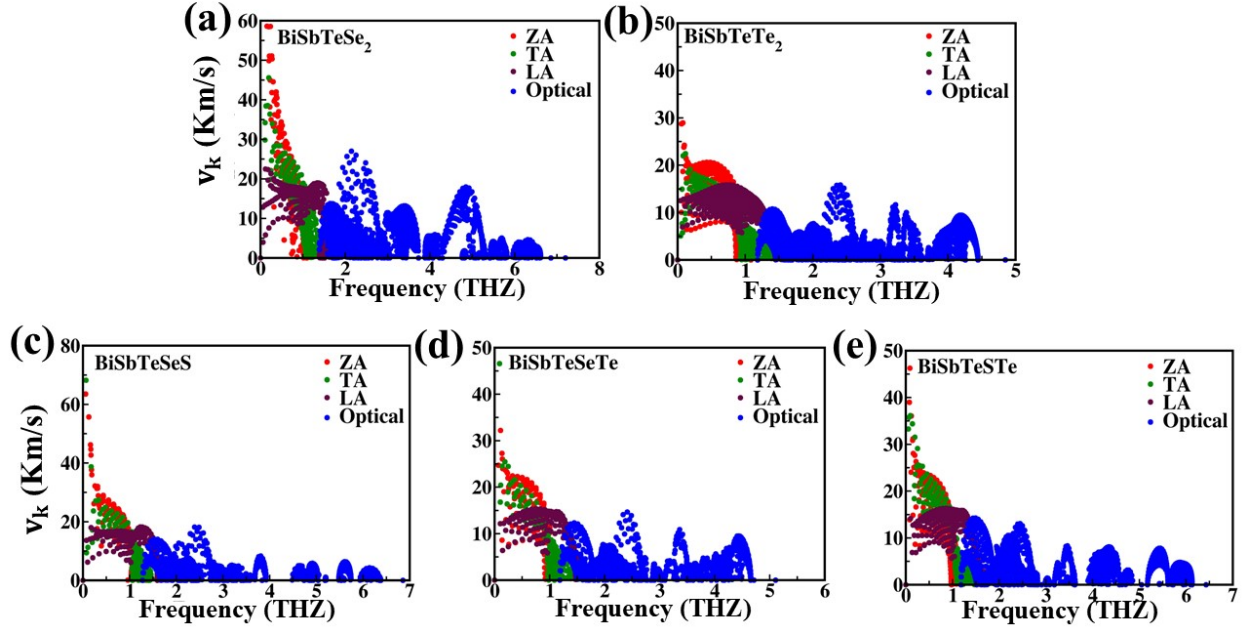

**Fig. S10** The calculated group velocity for the  $\text{BiSbTeX}_2$  ( $X = \text{Se, Te}$ ) and Janus  $\text{BiSbTeXY}$  ( $X/Y = \text{S, Se, Te}$ ) monolayers.

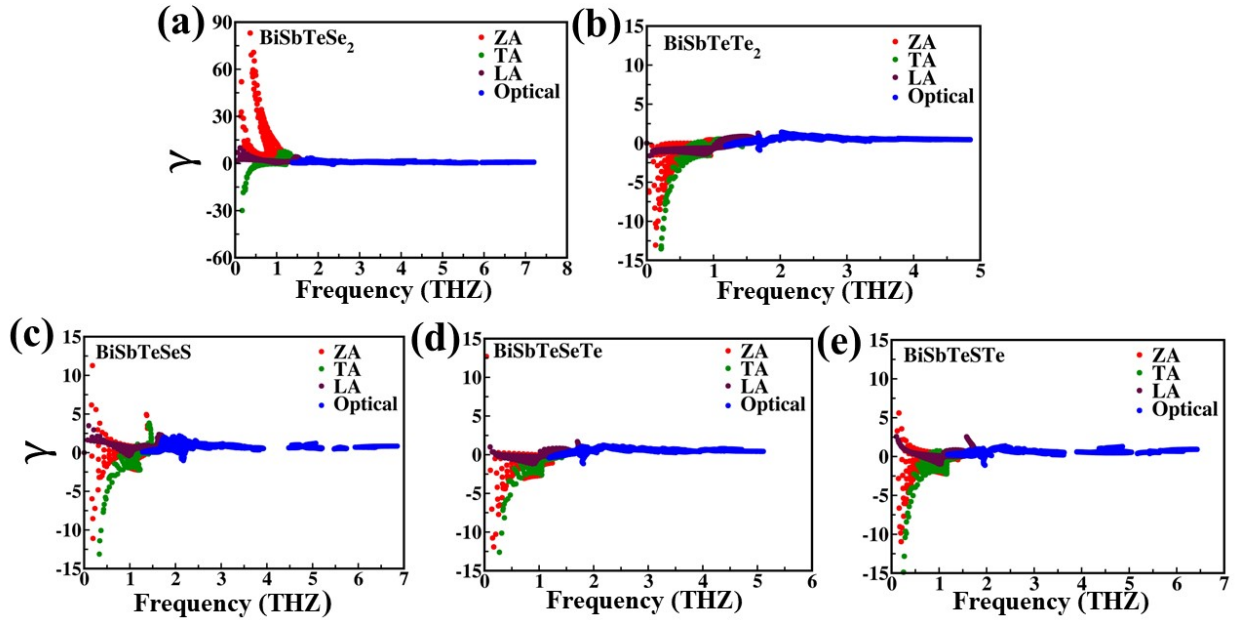

**Fig. S11** The calculated Gruneisen parameter for the  $\text{BiSbTeX}_2$  ( $X = \text{Se, Te}$ ) and Janus  $\text{BiSbTeXY}$  ( $X/Y = \text{S, Se, Te}$ ) monolayers.

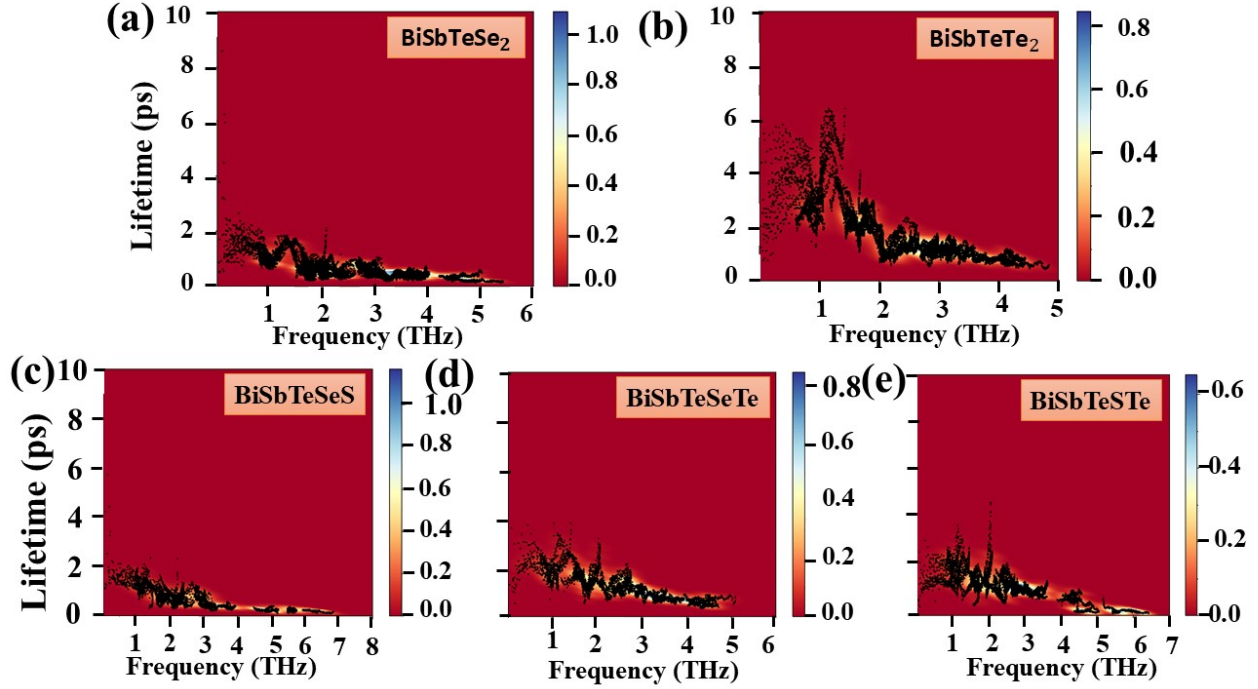

**Fig. S12** Phonon life time plots for  $\text{BiSbTeX}_2$  ( $X = \text{Se}, \text{Te}$ ) and for Janus  $\text{BiSbTeXY}$  ( $X/Y = \text{S}, \text{Se}, \text{Te}$ ) monolayers.

### Electronic transport properties

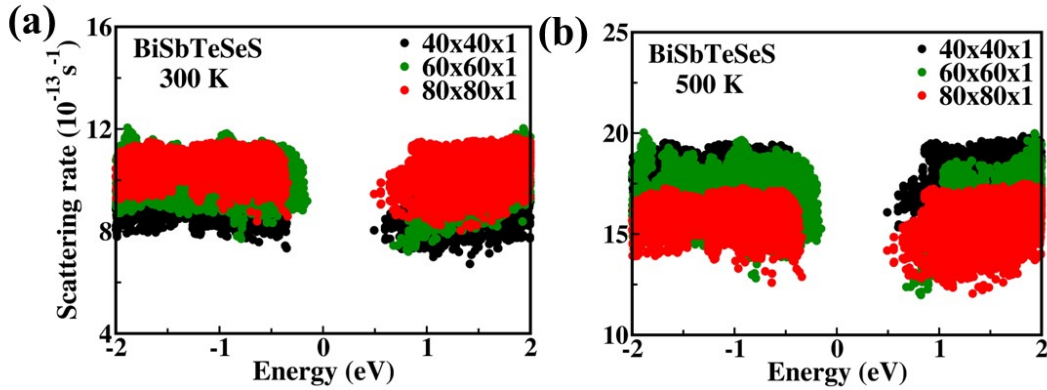

**Fig. S13** The lattice thermal conductivities convergence at the different q-mesh grids of the (a)-(b)  $\text{BiSbTeX}_2$  ( $X = \text{Se}, \text{Te}$ ) and (c)-(e) Janus  $\text{BiSbTeXY}$  ( $X/Y = \text{S}, \text{Se}, \text{Te}$ ) monolayers.



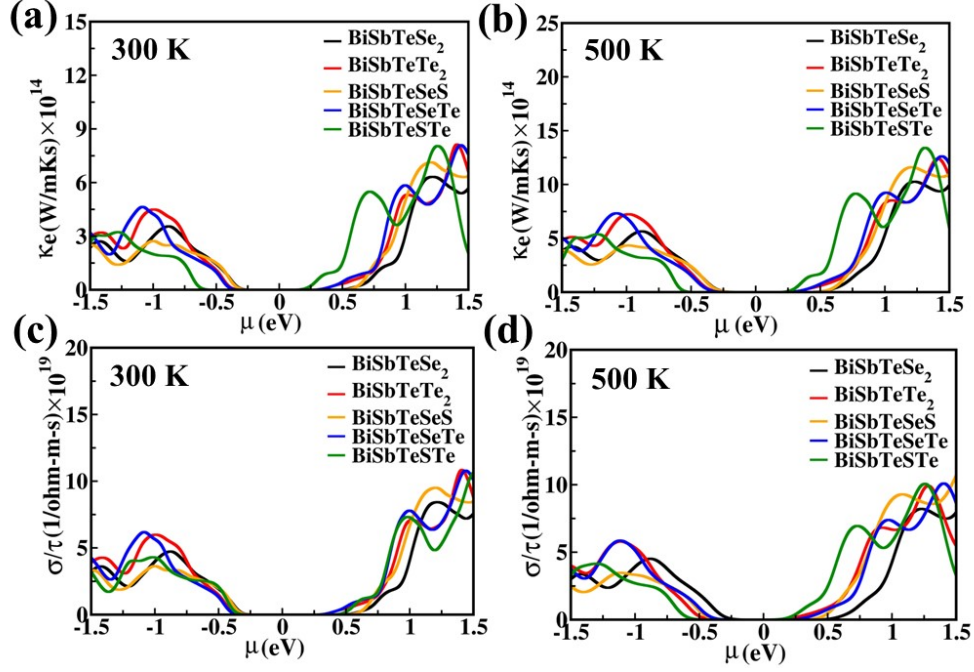

**Fig. S14** The calculated (a)-(b) electronic thermal conductivity ( $\kappa_e/\tau$ ) and (c)-(d) electrical conductivity ( $\sigma/\tau$ ) with PBE method for p-type and n-type BiSbTeX<sub>2</sub> (X = Se, Te) and Janus BiSbTeXY (X/Y = S, Se, Te) monolayers at 300 K and 500 K temperature.

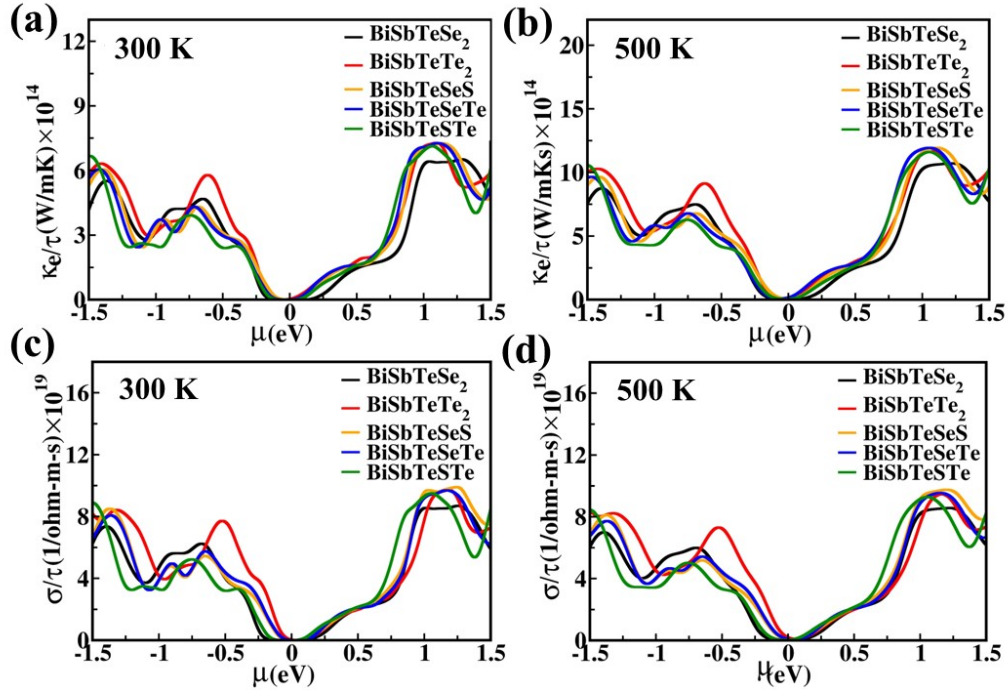

**Fig. S15** The calculated **(a)-(b)** electronic thermal conductivity ( $\kappa_e/\tau$ ) and **(c)-(d)** electrical conductivity ( $\sigma/\tau$ ) with PBE+SOC method of BiSbTeX<sub>2</sub> (X = Se, Te) and Janus BiSbTeXY (X/Y = S, Se, Te) monolayers at 300 K and 500 K temperature.

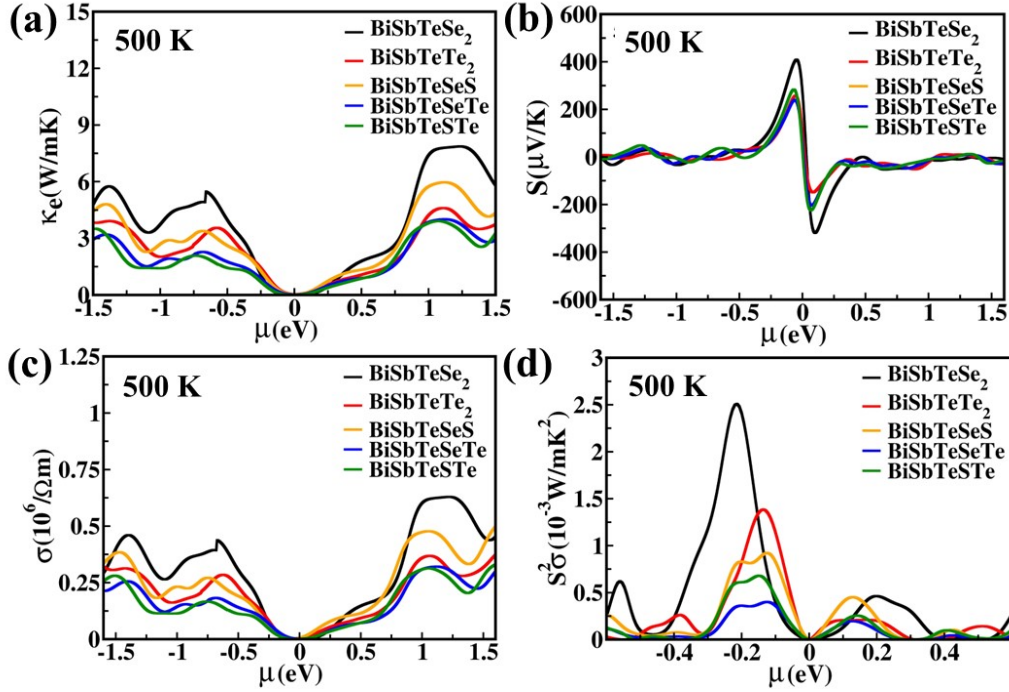

**Fig. S16** The calculated **(a)** electronic thermal conductivity ( $\kappa_e$ ), **(b)** Seebeck coefficient (S), **(c)** electrical conductivity ( $\sigma$ ) and **(d)** Power factor ( $S^2\sigma$ ) of BiSbTeX<sub>2</sub> (X=Se,Te) monolayers and Janus monolayers BiSbTeXY(X/Y=S,Se,Te) at 500K using PBE+SOC method.

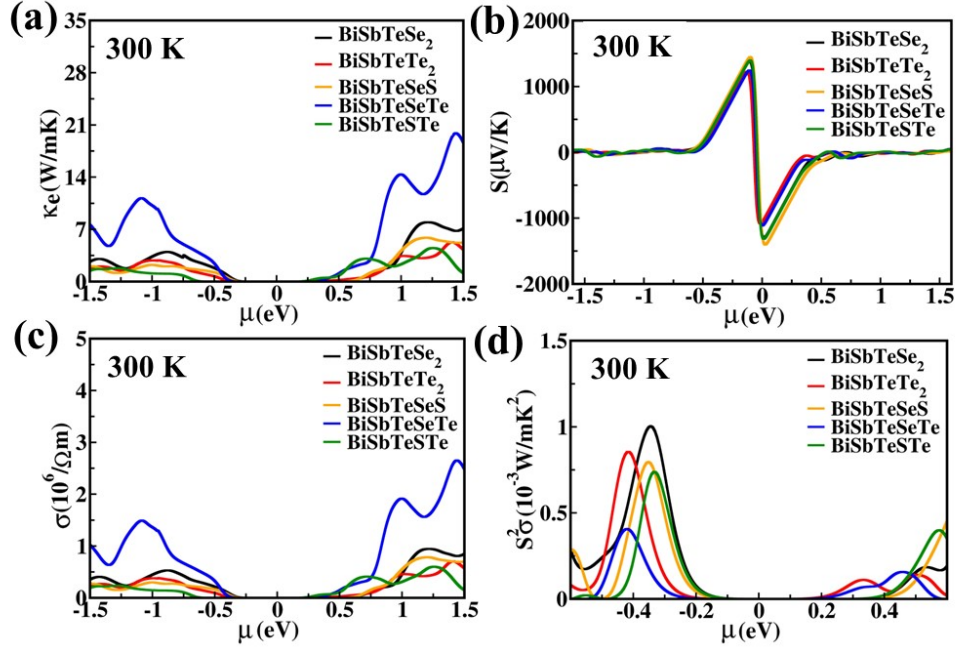

**Fig. S17** The calculated (a) electronic thermal conductivity, (b) Seebeck coefficient, (c) electrical conductivity and (d) Power factor of  $\text{BiSbTeX}_2$  ( $X = \text{Se}, \text{Te}$ ) and Janus  $\text{BiSbTeXY}$  ( $X/Y = \text{S}, \text{Se}, \text{Te}$ ) monolayers at 300 K using PBE method.

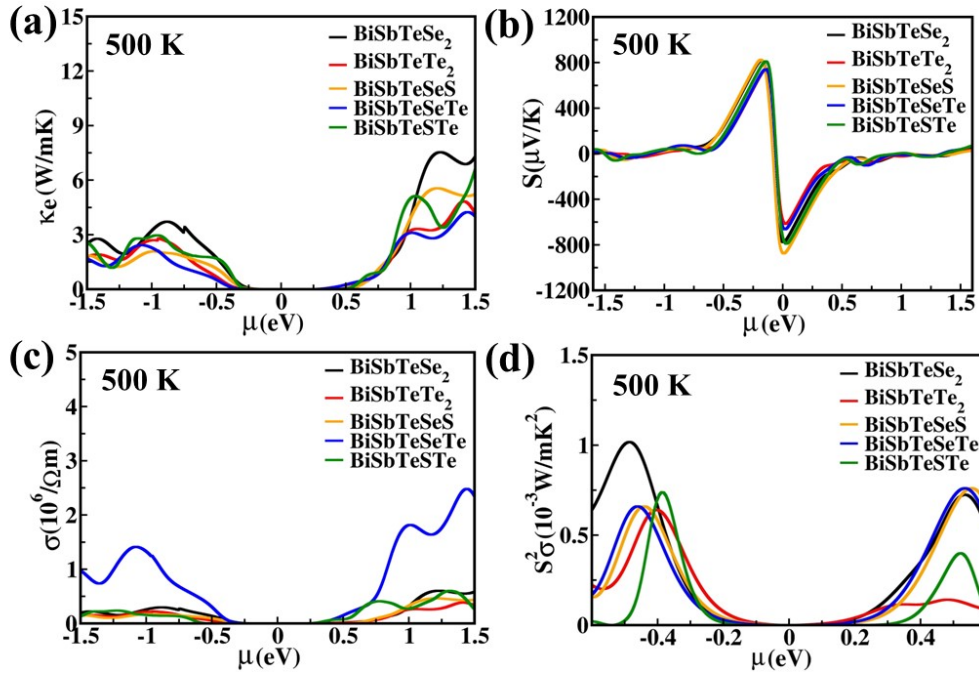

**Fig. S18** The calculated (a) electronic thermal conductivity, (b) Seebeck coefficient, (c) electrical conductivity and (d) Power factor of  $\text{BiSbTeX}_2$  ( $X = \text{Se}, \text{Te}$ ) and Janus monolayers  $\text{BiSbTeXY}$  ( $X/Y = \text{S}, \text{Se}, \text{Te}$ ) at 500K using PBE method.

**Table S2:** The calculated: Seebeck coefficient (S) of BiSbTeX<sub>2</sub> (X = Se, Te) and Janus monolayers BiSbTeXY (X/Y = S, Se, Te) using PBE and PBE+SOC method.

| Materials             | Carriers | S ( $\mu\text{V/K}$ ) |        |         |        |
|-----------------------|----------|-----------------------|--------|---------|--------|
|                       |          | PBE                   |        | PBE+SOC |        |
|                       |          | 300 K                 | 500 K  | 300 K   | 500 K  |
| BiSbTeSe <sub>2</sub> | p-type   | 1383.90               | 821.37 | 658.24  | 411.34 |
|                       | n-type   | 1290.35               | 774.21 | 554.98  | 318.85 |
| BiSbTeTe <sub>2</sub> | p-type   | 1227.03               | 745.18 | 359.34  | 256.34 |
|                       | n-type   | 1088.66               | 612.86 | 232.28  | 223.61 |
| BiSbTeSeS             | p-type   | 1436.19               | 825.85 | 350.38  | 228.32 |
|                       | n-type   | 1402.40               | 877.29 | 262.16  | 160.11 |
| BiSbTeSeTe            | p-type   | 1249.44               | 749.66 | 374.28  | 237.66 |
|                       | n-type   | 1111.07               | 644.23 | 336.86  | 203.06 |
| BiSbTeSTe             | p-type   | 1398.84               | 812.41 | 440.01  | 282.48 |
|                       | n-type   | 1312.76               | 792.13 | 396.621 | 225.48 |

**Table S3:** The calculated: power factor ( $S^2\sigma$ ) of BiSbTeX<sub>2</sub> (X = Se, Te) and Janus monolayers BiSbTeXY (X/Y=S, Se, Te) with PBE method at 300 K temperature.

| Materials             | Carriers | $S^2\sigma \times 10^{-3} \text{W/mK}^2$ |       |         |       |
|-----------------------|----------|------------------------------------------|-------|---------|-------|
|                       |          | PBE                                      |       | PBE+SOC |       |
|                       |          | 300 K                                    | 500 K | 300 K   | 500 K |
| BiSbTeSe <sub>2</sub> | p-type   | 1.0                                      | 1.02  | 2.08    | 2.51  |
|                       | n-type   | 0.80                                     | 0.73  | 0.47    | 0.47  |
| BiSbTeTe <sub>2</sub> | p-type   | 0.85                                     | 0.63  | 1.16    | 1.37  |
|                       | n-type   | 0.11                                     | 0.11  | 0.24    | 0.21  |
| BiSbTeSeS             | p-type   | 0.80                                     | 0.66  | 0.47    | 0.91  |
|                       | n-type   | 0.75                                     | 0.75  | 0.18    | 0.45  |
| BiSbTeSeTe            | p-type   | 0.87                                     | 0.66  | 0.63    | 0.40  |
|                       | n-type   | 0.45                                     | 0.76  | 0.26    | 0.20  |
| BiSbTeSTe             | p-type   | 0.73                                     | 0.73  | 0.47    | 0.66  |
|                       | n-type   | 0.40                                     | 0.40  | 0.18    | 0.25  |

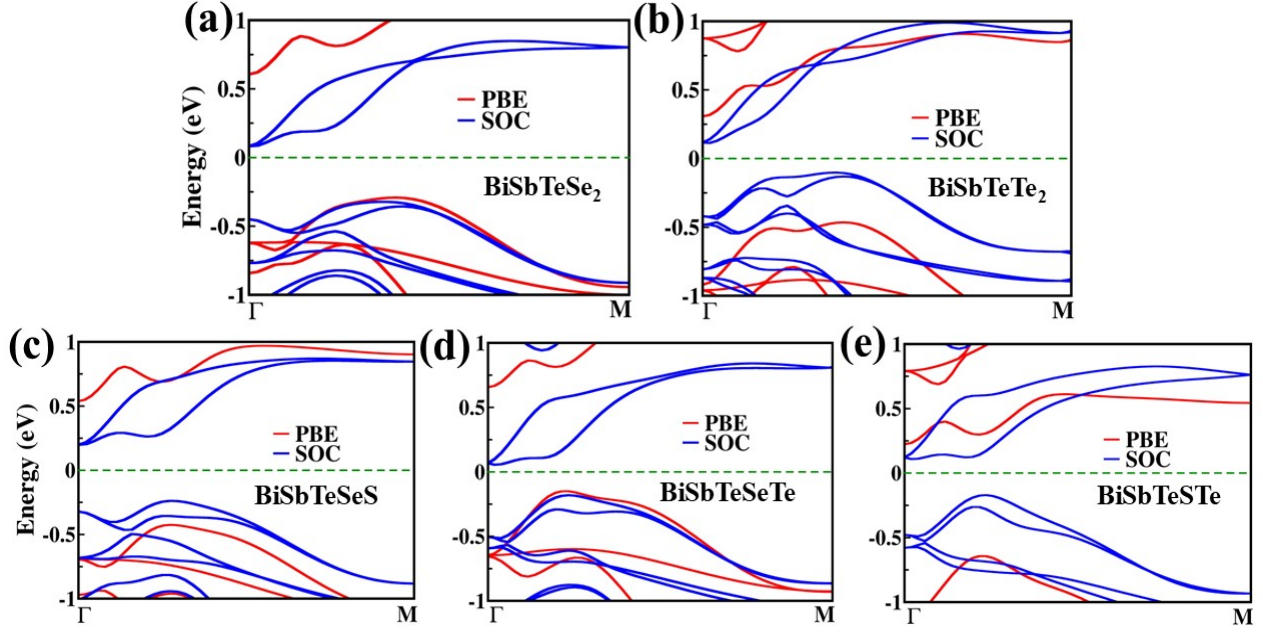

**Fig. S19** The calculated band structure of (a) BiSbTeSe<sub>2</sub> (b) BiSbTeTe<sub>2</sub> and Janus (c) BiSbTeSeS, (d) BiSbTeSeTe, (e) BiSbTeSTe monolayers with PBE method (red color band) and PBE+SOC level (blue color band).

**Table S4:** Illustrations of ZT with PBE and PBE+SOC methods of BiSbTeX<sub>2</sub> (X=Se,Te) and Janus BiSbTeXY (X/Y = S, Se, Te) monolayers at 300 K temperature.

| Materials             | (ZT)            |                 |                 |                 |
|-----------------------|-----------------|-----------------|-----------------|-----------------|
|                       | PBE             |                 | PBE+SOC         |                 |
|                       | 300 K           | 500 K           | 300 K           | 500 K           |
| BiSbTeSe <sub>2</sub> | 0.72(p)-0.58(n) | 1.31(p)-0.67(n) | 1.37(p)-0.42(n) | 1.99(p)-0.79(n) |
| BiSbTeTe <sub>2</sub> | 0.49(p)-0.09(n) | 0.86(p)-0.22(n) | 0.68(p)-0.14(n) | 1.08(p)-0.31(n) |
| BiSbTeSeS             | 0.63(p)-0.39(n) | 1.17(p)-1.08(n) | 0.70(p)-0.40(n) | 1.13(p)-0.67(n) |
| BiSbTeSeTe            | 0.52(p)-0.18(n) | 0.85(p)-0.41(n) | 0.35(p)-0.18(n) | 0.88(p)-0.49(n) |
| BiSbTeSTe             | 0.59(p)-0.33(n) | 0.86(p)-0.47(n) | 0.55(p)-0.24(n) | 1.01(p)-0.48(n) |

**Table S5:** ZT of various 2D monolayers are listed here.

| Materials                          | Figure of Merit (ZT) | Temperature (K) | References |
|------------------------------------|----------------------|-----------------|------------|
| Bi <sub>2</sub> TeSe <sub>2</sub>  | 0.87-3.45            | 300-900         | 1          |
| Bi <sub>2</sub> Te <sub>2</sub> S  | ~ 0.6-0.8            | 300 -700        | 2          |
| Bi <sub>2</sub> Te <sub>2</sub> Se | ~ 0.6-0.8            |                 |            |
| Bi <sub>2</sub> Te <sub>3</sub>    | ~ 0.6-0.8            |                 |            |

|                                                                                                                           |                                        |             |   |
|---------------------------------------------------------------------------------------------------------------------------|----------------------------------------|-------------|---|
| <b>Bi<sub>2</sub>Te<sub>2</sub>Se</b>                                                                                     | 1.4- 2.0 (p)                           | 300-500     | 3 |
| <b>Bi<sub>2</sub>SSe<sub>2</sub></b><br><b>Bi<sub>2</sub>S<sub>2</sub>Se</b>                                              | 0.50-0.28(p)<br>1.39- 0.93(p)          | 300-700     | 4 |
| <b>Bi<sub>2</sub>Te<sub>3</sub></b><br><b>BiPTe<sub>3</sub></b><br><b>BiSbTe<sub>3</sub></b><br><b>BiAsTe<sub>3</sub></b> | 0.61<br>1.01<br>1.08<br>1.10           | 300         | 5 |
| <b>Sb<sub>2</sub>Te<sub>2</sub>Se</b><br><b>Sb<sub>2</sub>Te<sub>2</sub>Se</b>                                            | 1.28-2.28-2.98(p)<br>1.86-2.99-3.75(n) | 300-500-700 | 6 |
| <b>WS<sub>2</sub></b><br><b>Janus WSSe</b><br><b>Janus WSTe</b>                                                           | 0.006<br>0.013<br>0.742                | 300         | 7 |
| <b>WSe<sub>2</sub></b>                                                                                                    | 0.138                                  | 300         | 8 |

**Table S6:** The calculated efficiency ( $\eta_{max}$ ) with PBE and PBE+SOC methods of BiSbTeX<sub>2</sub> (X=Se,Te) and Janus BiSbTeXY (X/Y = S, Se, Te) monolayers . Also these monolayers is compare with other monolayers.

| Materials                                                  | $\eta_{max}$ (%) |             | References |
|------------------------------------------------------------|------------------|-------------|------------|
|                                                            | PBE              | PBE+SOC     |            |
| <b>BiSbTeSe<sub>2</sub></b>                                | 34(p)-33(n)      | 35(p)-32(n) | This work  |
| <b>BiSbTeTe<sub>2</sub></b>                                | 33(p)-26(n)      | 34(p)-30(n) |            |
| <b>BiSbTeSeS</b>                                           | 33(p)-32(n)      | 34(p)-32(n) |            |
| <b>BiSbTeSeTe</b>                                          | 33(p)-29(n)      | 30(p)-29(n) |            |
| <b>BiSbTeSTe</b>                                           | 34(p)-31(n)      | 33(p)-30(n) |            |
| X <sub>2</sub> YH <sub>2</sub> (X=Si, Ge; Y=P, As, Sb, Bi) |                  | 18(p)-10(n) | 9          |

## References

1. N. Wang, C. Shen, Z. Sun, H. Xiao, H. Zhang, Z. Yin and L. Qiao, *ACS Applied Energy Materials*, 2022, **5**, 2564-2572.

2. Z. Rashid, A. S. Nissimagoudar and W. Li, *Physical Chemistry Chemical Physics*, 2019, **21**, 5679-5688.
3. N. T. Hung, A. R. Nugraha and R. Saito, *Nano Energy*, 2019, **58**, 743-749.
4. S.-H. Cao, T. Zhang, C.-E. Hu, X.-R. Chen and H.-Y. Geng, *Physical Chemistry Chemical Physics*, 2022, **24**, 26753-26763.
5. T. Li, J. Pu, T. Yu, Z. Hu and X. Shao, *New Journal of Chemistry*, 2023, **47**, 13309-13319.
6. Y. Chen, Y. Wu, B. Hou, J. Cao, H. Shao, Y. Zhang, H. Mei, C. Ma, Z. Fang and H. Zhu, *Journal of Materials Chemistry A*, 2021, **9**, 16108-16118.
7. A. Patel, D. Singh, Y. Sonvane, P. Thakor and R. Ahuja, *ACS applied materials & interfaces*, 2020, **12**, 46212-46219.
8. S. Kumar and U. Schwingenschlogl, *Chemistry of Materials*, 2015, **27**, 1278-1284.
9. M. A. Mohebpour, S. M. Mozvashi, S. I. Vishkayi and M. B. Tagani, *Scientific Reports*, 2021, **11**, 23840.
